# Supplementary material for: Bifidobacterium Strain-Specific Enhances the Efficacy of Cancer Therapeutics in Tumor-Bearing Mice
Source: Cancers (Basel). 2021 Feb 25;13(5):957. doi: 10.3390/cancers13050957 (PMC7956760; doi:10.3390/cancers13050957)
Supplement: Supplementary file 1 [file cancers-13-00957-s001.zip]

Archive with 5 entries (5 files):
- Supplementary Table 1.xlsx
- Supplementary Table 2.xlsx
- Supplementary Table 3.xls
- Supplementary Table 4.xls
- cancers-1098313-supplementary figures.pdf
