# Supplementary material for: Bifidobacterium Strain-Specific Enhances the Efficacy of Cancer Therapeutics in Tumor-Bearing Mice
Source: Cancers (Basel). 2021 Feb 25;13(5):957. doi: 10.3390/cancers13050957 (PMC7956760; doi:10.3390/cancers13050957)
Supplement: Supplementary file 1 [file cancers-13-00957-s001.zip › cancers-1098313-supplementary figures.pdf]

# Supplementary Materials: Bifidobacterium Strain-Specific Enhances the Efficacy of Cancer Therapeutics in Tumor-Bearing Mice

Youngmin Yoon, Gihyeon Kim, Bu-Nam Jeon, Sungsoo Fang and Hansoo Park

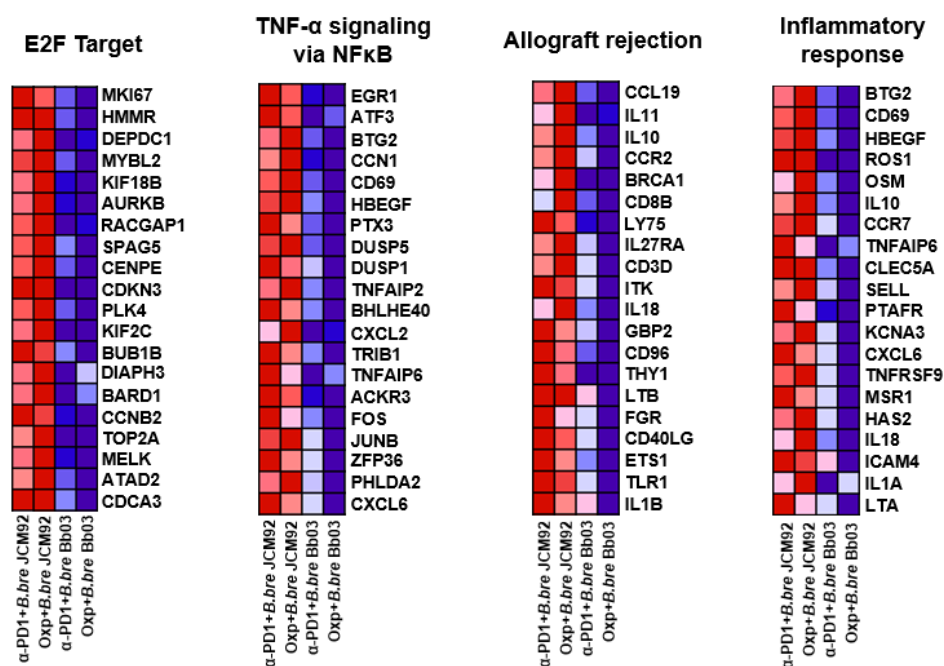

**Figure S1.** GSEA of intestine RNA sequencing data. The heatmap shows gene expression levels of gene set of E2F targets, TNF $\alpha$  signaling via NF $\kappa$ B, allogenic rejection, and inflammatory response. Red and blue indicate expression levels above and below the median of each gene expression across the samples, respectively.

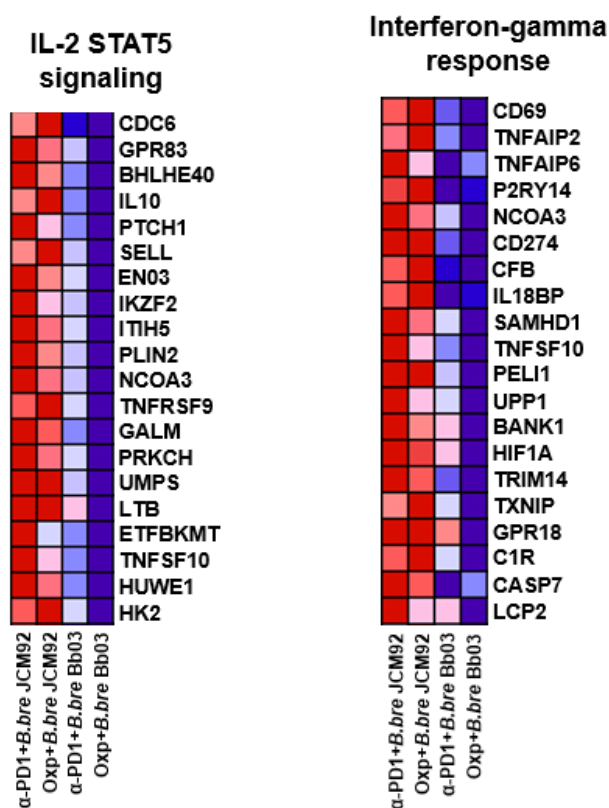

**Figure S2.** GSEA of intestine RNA sequencing data. The heatmap shows gene expression levels of gene set of IL-2 STAT5 signaling and interferon-gamma response.
