# Supplementary material for: Bifidobacterium Strain-Specific Enhances the Efficacy of Cancer Therapeutics in Tumor-Bearing Mice
Source: Cancers (Basel). 2021 Feb 25;13(5):957. doi: 10.3390/cancers13050957 (PMC7956760; doi:10.3390/cancers13050957)
Supplement: Supplementary file 1 [file cancers-13-00957-s001.zip › Supplementary Table 1.xlsx]

## Sheet: Sheet1
Supplementary Table 1. Bifidobacterium strains used in this study
Species	Strain	Abbreviation in figure
Bifidobacterium breve	JCM1192	B. bre JCM92
Bifidobacterium breve	Bb03	B. bre Bb03
