# Supplementary material for: Bifidobacterium Strain-Specific Enhances the Efficacy of Cancer Therapeutics in Tumor-Bearing Mice
Source: Cancers (Basel). 2021 Feb 25;13(5):957. doi: 10.3390/cancers13050957 (PMC7956760; doi:10.3390/cancers13050957)
Supplement: Supplementary file 1 [file cancers-13-00957-s001.zip › Supplementary Table 2.xlsx]

## Sheet: Sheet1
Supplementary Table 2. Upregulated genes in B. bre JCM92 compared to B. bre Bb03
gene_name	03_FPKM	1192_FPKM	FC
trmD	55.5345	111.63	2.0101
rpsA	3819.97	7749.36	2.02864
rsmD	68.9568	140.709	2.04054
atpD	2017.44	4119.32	2.04186
rimI	34.087	70.1471	2.05788
ftsY	114.299	238.686	2.08826
pepN	260.237	544.309	2.09159
ruvA	97.8721	205.35	2.09815
xerD	107.427	225.452	2.09865
dusB	13.5795	28.7062	2.11394
pstC	79.8124	173.036	2.16803
uvrC	29.9493	65.2375	2.17826
rpmA	1280.49	2809.24	2.19388
mtnN	51.1126	112.707	2.20507
dinB	48.5527	107.842	2.22113
aroA	25.4803	57.2302	2.24606
tsaB	45.6877	105.469	2.30848
nudC	238.626	551.588	2.31152
rplU	679.288	1573.86	2.31693
adhE	104.621	243.268	2.32523
rpmG	702.567	1641.43	2.33633
dnaB	69.9101	163.397	2.33724
nadB	17.7594	41.913	2.36005
nrdR	244.279	579.504	2.3723
gyrA	264.953	631.206	2.38233
dnaA	41.7669	99.6194	2.38513
thiC	35.4093	85.2545	2.40769
truA	32.6551	78.8327	2.4141
ybeY	84.4528	207.051	2.45168
secG	972.688	2387.2	2.45423
proC	107.368	272.458	2.53761
gcvH	293.4	749.16	2.55337
rsmG	35.9077	94.0669	2.61969
arc	50.8204	134.791	2.6523
aroC	62.8787	166.915	2.65456
nrdI	552.335	1487.48	2.69308
aroQ	40.2536	110.141	2.73618
brnQ	41.9186	115.862	2.76398
atpE	856.732	2396.39	2.79713
hpt	763.83	2147.73	2.81179
gyrB	292.944	828.054	2.82666
recO	22.8871	65.2631	2.85152
nadA	21.5135	61.3582	2.85208
ptsP	1325.9	3786.94	2.85613
glmS	101.035	290.873	2.87893
secE	268.437	784.241	2.92151
prfA	79.5768	236.381	2.97048
folE	176.398	525.715	2.98028
clpX	49.8809	148.782	2.98274
coaD	171.335	517.826	3.0223
prmC	36.3477	113.769	3.13002
crgA	424.018	1329.61	3.13574
dapF	67.8085	213.803	3.15304
leuD	16.2147	52.6967	3.24993
rbfA	77.9108	257.377	3.30348
rlmH	270.785	908.39	3.35465
nagB	148.116	507.65	3.42738
murA	189.044	664.05	3.51267
mscL	14.4792	51.737	3.57319
rmuC	59.2707	218.983	3.69462
dnaK	1959.58	7478.25	3.81625
htpX	512.927	1970.56	3.84179
recF	11.8719	47.615	4.01073
pyrB	121.4	492.273	4.05497
tenA	7.41044	30.1503	4.06862
trmB	31.3541	130.563	4.16414
lepB	51.4433	227.967	4.43142
rho	119.186	531.981	4.46345
pstS	88.7444	405.579	4.57019
malQ	187.9	912.275	4.85511
ilvC	10.9688	53.5422	4.88132
pulA	74.2404	362.908	4.88828
nucS	27.6488	142.845	5.16641
atpB	253.908	1325.65	5.22099
nagB	79.3954	424.228	5.34323
leuC	15.817	87.3946	5.52536
dnaN	74.9119	443.496	5.92023
glf	52.3955	348.332	6.64813
budA	26.1597	199.619	7.63078
recA	148.955	1211.32	8.13212
yddG	23.121	193.275	8.35928
pdxT	18.4618	228.573	12.3809
pdxS	20.7351	263.047	12.6861
tadA	1.32365	19.7311	14.9066
clpB	479.803	7586.64	15.812
gluQRS	43.7605	927.447	21.1937
fetB	0.231639	130.316	562.582
xylB	0.840338	669.385	796.566

## Sheet: Sheet2
GOTerm	Term PValue Corrected with Bonferroni step down	Associated Genes Found
peptide metabolic process	0.000840248	[dnaA, lepB, pepN, prfA, prmC, rplU, rpmA, rpmG, rpsA, ybeY]
cellular amino acid metabolic process	0.000296591	[aroA, aroC, dapF, gcvH, glmS, ilvC, leuC, leuD, mtn, nadA, nadB, proC, pyrB]
intracellular protein transport	0.00378969	[ftsY, secE, secG]
ribonucleoside metabolic process	0.000419953	[atpB, atpD, atpE, coaD, folE, hpt, mtn, pyrB]
protein processing	0.00378969	[clpB, lepB, recA]
DNA duplex unwinding	0.0427486	[dnaB, gyrA, gyrB, ruvA]
ncRNA processing	1.38234e-06	[dusB, rbfA, rho, rlmH, rsmD, rsmG, tadA, trmD, truA, tsaB, ybeY]
amino sugar biosynthetic process	0.000599781	[glmS, murA, nagB]
