# Supplementary material for: Bifidobacterium Strain-Specific Enhances the Efficacy of Cancer Therapeutics in Tumor-Bearing Mice
Source: Cancers (Basel). 2021 Feb 25;13(5):957. doi: 10.3390/cancers13050957 (PMC7956760; doi:10.3390/cancers13050957)
Supplement: Supplementary file 1 [file cancers-13-00957-s001.zip › Supplementary Table 3.xls]

## Sheet: ClueGO Results
Supplementary Table 3. Gene Ontology of differentially expressed genes (DEGs) in B. bre JCM92 compared to B. bre Bb03
GOID	GOTerm	Ontology Source	Term PValue	Term PValue Corrected with Bonferroni step down	Group PValue	Group PValue Corrected with Bonferroni step down	GOLevels	GOGroups	% Associated Genes	Nr. Genes	Associated Genes Found
GO:0016485	protein processing	GO_BiologicalProcess-GOA_18.11.2016_14h17	0.000473711	0.00378969	0.000473711	0.00142113	[5, 6]	Group0	18.75	3	[clpB, lepB, recA]
GO:0032508	DNA duplex unwinding	GO_BiologicalProcess-GOA_18.11.2016_14h17	0.0142495	0.0427486	0.0142495	0.0142495	[7]	Group1	4.21053	4	[dnaB, gyrA, gyrB, ruvA]
GO:0006886	intracellular protein transport	GO_BiologicalProcess-GOA_18.11.2016_14h17	0.000473711	0.00378969	0.000473711	0.00142113	[4, 5, 6]	Group2	18.75	3	[ftsY, secE, secG]
GO:0046349	amino sugar biosynthetic process	GO_BiologicalProcess-GOA_18.11.2016_14h17	3.15674e-05	0.000599781	0.00161758	0.00323516	[5]	Group3	42.8571	3	[glmS, murA, nagB]
GO:0009226	nucleotide-sugar biosynthetic process	GO_BiologicalProcess-GOA_18.11.2016_14h17	0.00161758	0.0113231	0.00161758	0.00323516	[5, 6]	Group3	12.5	3	[glmS, murA, nagB]
GO:0009266	response to temperature stimulus	GO_BiologicalProcess-GOA_18.11.2016_14h17	0.00179567	0.010774	1.68322e-05	8.4161e-05	[3]	Group4	5.61798	5	[clpB, dnaK, htpX, rbfA, ybeY]
GO:0009408	response to heat	GO_BiologicalProcess-GOA_18.11.2016_14h17	0.0283018	0.0283018	1.68322e-05	8.4161e-05	[3, 4]	Group4	4.47761	3	[clpB, dnaK, ybeY]
GO:0006518	peptide metabolic process	GO_BiologicalProcess-GOA_18.11.2016_14h17	4.66804e-05	0.000840248	1.68322e-05	8.4161e-05	[4, 5]	Group4	4.62963	10	[dnaA, lepB, pepN, prfA, prmC, rplU, rpmA, rpmG, rpsA, ybeY]
GO:0043241	protein complex disassembly	GO_BiologicalProcess-GOA_18.11.2016_14h17	0.0163609	0.0327219	1.68322e-05	8.4161e-05	[5]	Group4	4.0404	4	[dnaK, prfA, prmC, ybeY]
GO:0006412	translation	GO_BiologicalProcess-GOA_18.11.2016_14h17	0.000263664	0.00316397	1.68322e-05	8.4161e-05	[5, 6, 7]	Group4	4.67836	8	[dnaA, prfA, prmC, rplU, rpmA, rpmG, rpsA, ybeY]
GO:0001510	RNA methylation	GO_BiologicalProcess-GOA_18.11.2016_14h17	0.000344222	0.00344222	1.09478e-07	7.66344e-07	[4, 5, 6, 7, 8]	Group5	8.06452	5	[rho, rlmH, rsmD, rsmG, trmD]
GO:0009451	RNA modification	GO_BiologicalProcess-GOA_18.11.2016_14h17	1.67611e-06	4.02267e-05	1.09478e-07	7.66344e-07	[5, 6, 7]	Group5	7.82609	9	[dusB, rho, rlmH, rsmD, rsmG, tadA, trmD, truA, tsaB]
GO:0034470	ncRNA processing	GO_BiologicalProcess-GOA_18.11.2016_14h17	5.52935e-08	1.38234e-06	1.09478e-07	7.66344e-07	[6, 7, 8]	Group5	8.33333	11	[dusB, rbfA, rho, rlmH, rsmD, rsmG, tadA, trmD, truA, tsaB, ybeY]
GO:0006364	rRNA processing	GO_BiologicalProcess-GOA_18.11.2016_14h17	3.02165e-05	0.00060433	1.09478e-07	7.66344e-07	[5, 7, 8, 9]	Group5	9.67742	6	[rbfA, rho, rlmH, rsmD, rsmG, ybeY]
GO:0006400	tRNA modification	GO_BiologicalProcess-GOA_18.11.2016_14h17	0.000295014	0.00324515	1.09478e-07	7.66344e-07	[6, 7, 8, 9, 10]	Group5	8.33333	5	[dusB, tadA, trmD, truA, tsaB]
GO:0006520	cellular amino acid metabolic process	GO_BiologicalProcess-GOA_18.11.2016_14h17	1.28953e-05	0.000296591	1.28953e-05	7.73716e-05	[3, 4, 6, 7]	Group6	4.04984	13	[aroA, aroC, dapF, gcvH, glmS, ilvC, leuC, leuD, mtn, nadA, nadB, proC, pyrB]
GO:0008652	cellular amino acid biosynthetic process	GO_BiologicalProcess-GOA_18.11.2016_14h17	0.000346195	0.00311575	1.28953e-05	7.73716e-05	[4, 5, 6, 7, 8]	Group6	4.49438	8	[aroA, aroC, dapF, ilvC, leuC, leuD, mtn, proC]
GO:1901605	alpha-amino acid metabolic process	GO_BiologicalProcess-GOA_18.11.2016_14h17	0.00012973	0.00194595	1.28953e-05	7.73716e-05	[4, 5, 7, 8]	Group6	4.09836	10	[dapF, gcvH, glmS, ilvC, leuC, leuD, mtn, nadA, nadB, proC]
GO:0009066	aspartate family amino acid metabolic process	GO_BiologicalProcess-GOA_18.11.2016_14h17	0.00630532	0.0252213	1.28953e-05	7.73716e-05	[5, 6, 8, 9]	Group6	5.33333	4	[dapF, mtn, nadA, nadB]
GO:0009082	branched-chain amino acid biosynthetic process	GO_BiologicalProcess-GOA_18.11.2016_14h17	0.00281867	0.0140934	1.28953e-05	7.73716e-05	[5, 6, 7, 8, 9]	Group6	10.3448	3	[ilvC, leuC, leuD]
GO:0015986	ATP synthesis coupled proton transport	GO_BiologicalProcess-GOA_18.11.2016_14h17	5.01488e-05	0.000852529	0.000247429	0.000989717	[8, 9, 10, 11, 12]	Group7	37.5	3	[atpB, atpD, atpE]
GO:0090407	organophosphate biosynthetic process	GO_BiologicalProcess-GOA_18.11.2016_14h17	0.000153324	0.00214654	0.000247429	0.000989717	[4, 5]	Group7	4.01606	10	[atpB, atpD, atpE, coaD, folE, hpt, nadA, nadB, pyrB, thiC]
GO:0009119	ribonucleoside metabolic process	GO_BiologicalProcess-GOA_18.11.2016_14h17	1.90888e-05	0.000419953	0.000247429	0.000989717	[5, 6, 7]	Group7	6.77966	8	[atpB, atpD, atpE, coaD, folE, hpt, mtn, pyrB]
GO:0009165	nucleotide biosynthetic process	GO_BiologicalProcess-GOA_18.11.2016_14h17	2.9041e-05	0.000609861	0.000247429	0.000989717	[5, 6, 7, 8]	Group7	6.4	8	[atpB, atpD, atpE, coaD, hpt, nadA, nadB, pyrB]
GO:0046128	purine ribonucleoside metabolic process	GO_BiologicalProcess-GOA_18.11.2016_14h17	0.000231392	0.00300809	0.000247429	0.000989717	[6, 7, 8]	Group7	6.74157	6	[atpB, atpD, atpE, coaD, hpt, mtn]
GO:0009156	ribonucleoside monophosphate biosynthetic process	GO_BiologicalProcess-GOA_18.11.2016_14h17	7.40535e-05	0.00118486	0.000247429	0.000989717	[6, 7, 8, 9]	Group7	11.1111	5	[atpB, atpD, atpE, hpt, pyrB]
GO:0009260	ribonucleotide biosynthetic process	GO_BiologicalProcess-GOA_18.11.2016_14h17	3.02165e-05	0.00060433	0.000247429	0.000989717	[6, 7, 8, 9]	Group7	9.67742	6	[atpB, atpD, atpE, coaD, hpt, pyrB]
