# Supplementary material for: Bifidobacterium Strain-Specific Enhances the Efficacy of Cancer Therapeutics in Tumor-Bearing Mice
Source: Cancers (Basel). 2021 Feb 25;13(5):957. doi: 10.3390/cancers13050957 (PMC7956760; doi:10.3390/cancers13050957)
Supplement: Supplementary file 1 [file cancers-13-00957-s001.zip › Supplementary Table 4.xls]

## Sheet: ClueGO Results
Supplementary Table 4. Gene Ontology of differentially expressed genes (DEGs) in mice treated with cancer therapeutics and B. bre JCM92 compared to mice treated with cancer therapeutics and B. bre Bb03
GOID	GOTerm	Ontology Source	Term PValue	Term PValue Corrected with Bonferroni step down	Group PValue	Group PValue Corrected with Bonferroni step down	GOLevels	GOGroups	% Associated Genes	Nr. Genes	Associated Genes Found
GO:0032465	regulation of cytokinesis	GO_BiologicalProcess-EBI-UniProt-GOA-ACAP-ARAP_08.05.2020_00h00	6.52677e-07	6.52677e-07	6.52677e-07	6.52677e-07	[4, 5, 6]	Group0	4.5977	4	[Kif14, Kif20b, Kif23, Prc1]
